# Supplementary material for: Human Teeth-Derived Bioceramics for Improved Bone Regeneration
Source: MDPI journal article supplement (doi:10.3390/nano10122396), 2020-11-30
Supplement: s1 [file s1]

## Supplementary Materials

# Human Teeth-Derived Bioceramics for Improved Bone Regeneration

Ki-Taek Lim <sup>1,\*†</sup>, Dinesh K. Patel <sup>1,†</sup>, Sayan Deb Dutta <sup>1</sup>, Han-Wool Choung <sup>2</sup>, Hexiu Jin <sup>3</sup>, Arjak Bhattacharjee <sup>4</sup> and Jong Hoon Chung <sup>5,\*</sup>

<sup>1</sup> Department of Biosystems Engineering, Kangwon National University, Chuncheon 24341, Korea; dbhu10@gmail.com (D.K.P.); sayan91dutta@gmail.com (S.D.D.)

<sup>2</sup> Department of Oral and Maxillofacial Surgery and Dental Research Institute, School of Dentistry, Seoul National University, Seoul 151921, Korea; woolmania@naver.com

<sup>3</sup> Department of Plastic and Traumatic Surgery, School of Stomatology, Beijing Stomatological Hospital, Capital Medical University, Beijing 100069, China; hyuksoo725@daum.net

<sup>4</sup> Department of Materials Science and Engineering, Indian Institute of Technology, Kanpur 208016, India; arjak.ceramic16@gmail.com

<sup>5</sup> Department of Biosystems and Biomaterials Science and Engineering, Seoul National University, Seoul 151921, Korea

<sup>†</sup> These authors contributed equally to the paper.

\* Correspondence: ktlim@kangwon.ac.kr (K.-T.L.); jchung@snu.ac.kr (J.H.C.)

**Table S1.** The chemical compositions of the SBF solution used in this study.

| Reagent                                             | Amount (g/L) |
|-----------------------------------------------------|--------------|
| NaCl                                                | 6.547        |
| NaHCO <sub>3</sub>                                  | 2.268        |
| KCl                                                 | 0.373        |
| Na <sub>2</sub> HPO <sub>4</sub> ·2H <sub>2</sub> O | 0.178        |
| MgCl <sub>2</sub> ·6H <sub>2</sub> O                | 0.305        |
| CaCl <sub>2</sub> ·2H <sub>2</sub> O                | 0.368        |
| Na <sub>2</sub> SO <sub>4</sub>                     | 0.071        |
| (CH <sub>3</sub> OH) <sub>3</sub> CNH <sub>2</sub>  | 6.057        |
